# Supplementary material
Source: PubMed Central journal article supplement (PMC8892841)

**a**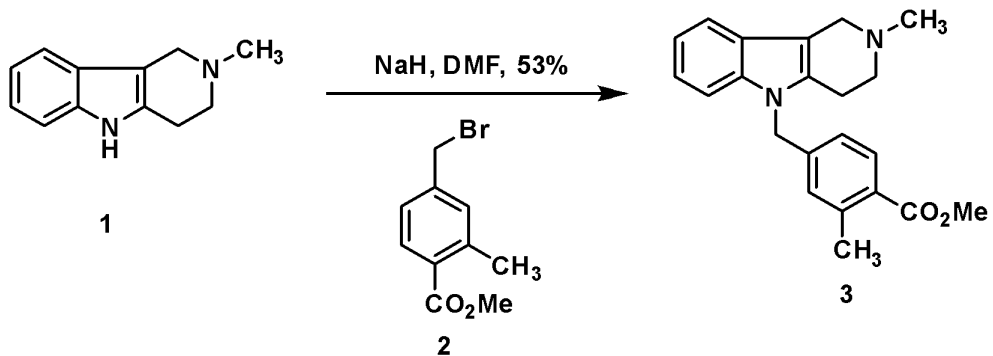**b**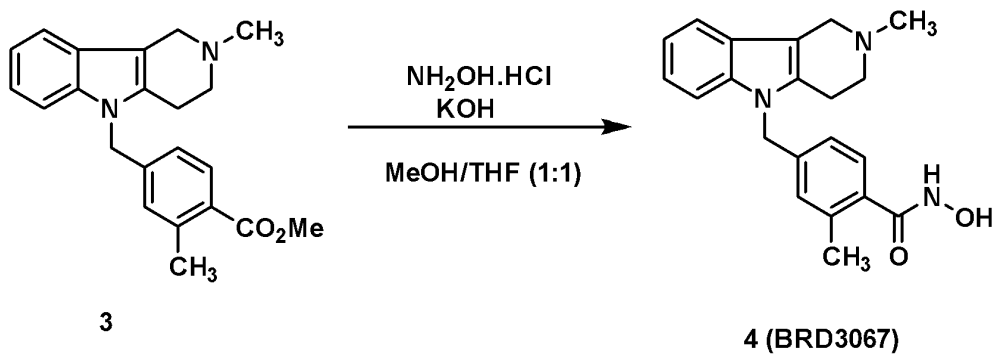

Current Data Parameters  
 NAME 53-4-34  
 EXPNO 1  
 PROCNO 1

F2 - Acquisition Parameters  
 Date\_ 20160608  
 Time 10.21  
 INSTRUM spect  
 PROBHD 5 mm PABBO BB/  
 PULPROG zg30  
 TD 32768  
 SOLVENT CDCl3  
 NS 15  
 DS 0  
 SWH 5208.333 Hz  
 FIDRES 0.158946 Hz  
 AQ 3.1457281 sec  
 RG 64.00  
 DW 96.000 usec  
 DE 18.87 usec  
 TE 298.0 K  
 D1 1.8000000 sec

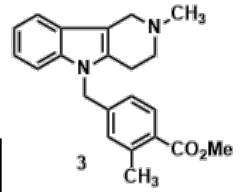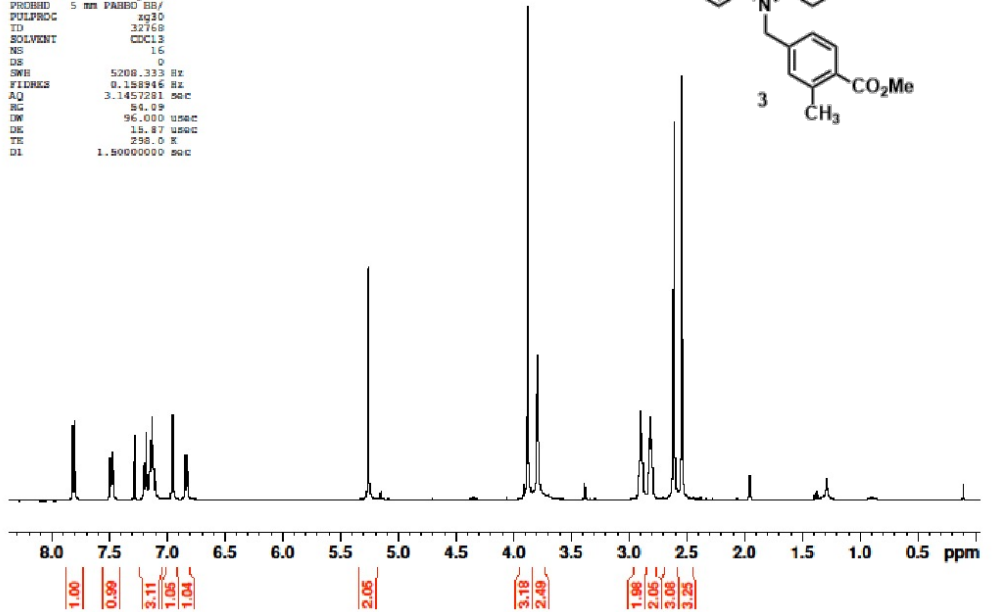

Current Data Parameters  
 NAME 53-4-36  
 EXPNO 1  
 PROCNO 1

F2 - Acquisition Parameters  
 Date\_ 20160610  
 Time 13.05  
 INSTRUM spect  
 PROBHD 5 mm PABBO BB/  
 PULPROG zg30  
 TD 32768  
 SOLVENT MeOD  
 NS 16  
 DS 0  
 SWH 5208.333 Hz  
 FIDRES 0.158946 Hz  
 AQ 3.1457281 sec  
 RG 70  
 DW 96.000 usec  
 DE 15.87 usec  
 TE 298.0 K  
 D1 1.8000000 sec

5.4344  
 5.4384

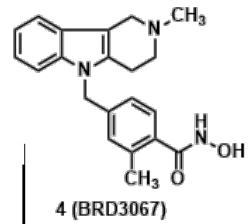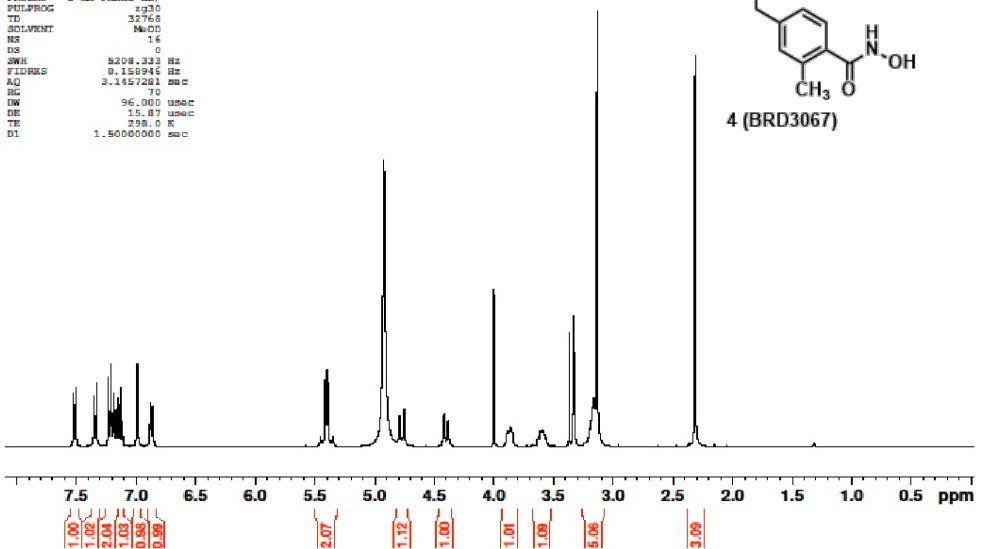

Supplement: NIHMS1762933-supplement-Supplementary_Figures_S1-2.pdf [file NIHMS1762933-supplement-Supplementary_Figures_S1-2.pdf]
