# Supplementary material
Source: PubMed Central journal article supplement (PMC8892841)
Supplement: NIHMS1762933-supplement-unmodified_blots_EDFig6.pdf [file NIHMS1762933-supplement-unmodified_blots_EDFig6.pdf]

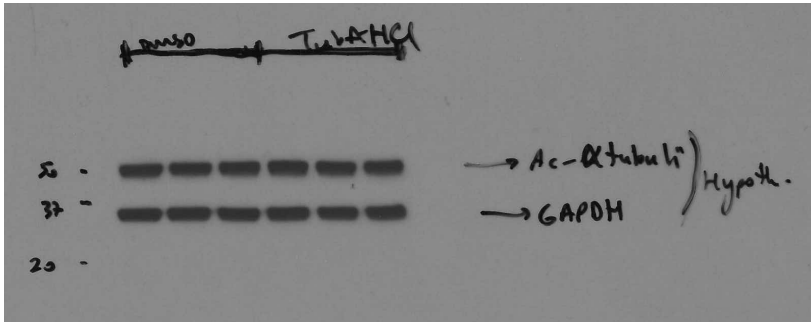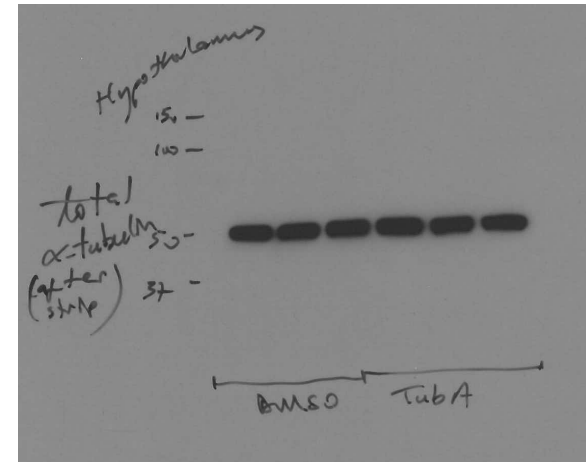

Extended Data Fig. 6b

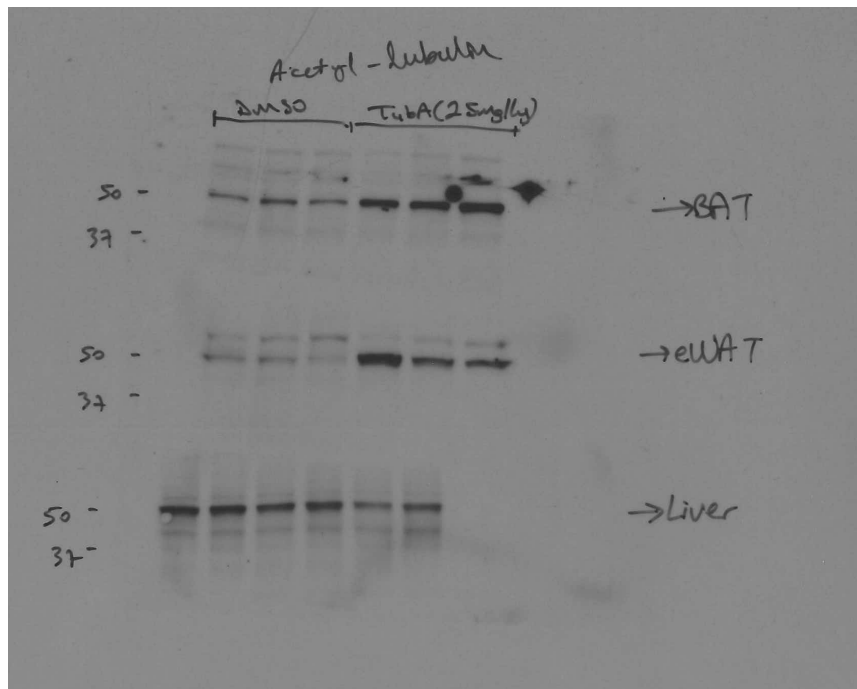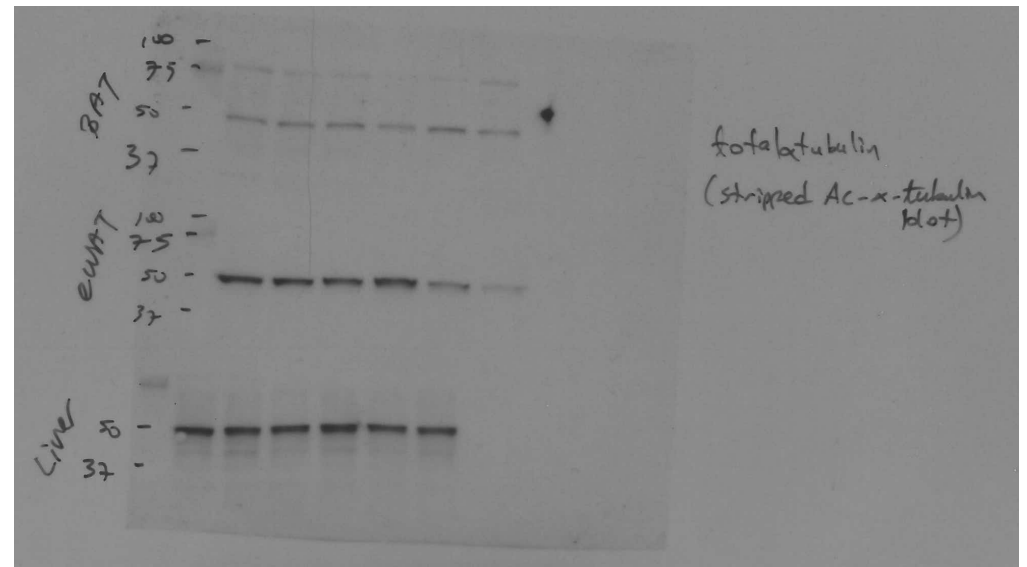

Fig. 6d and Extended Data Fig 6b

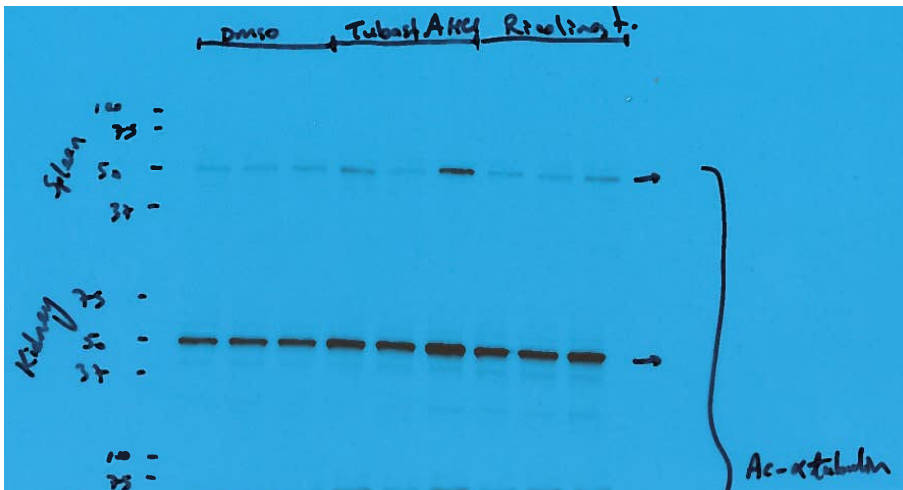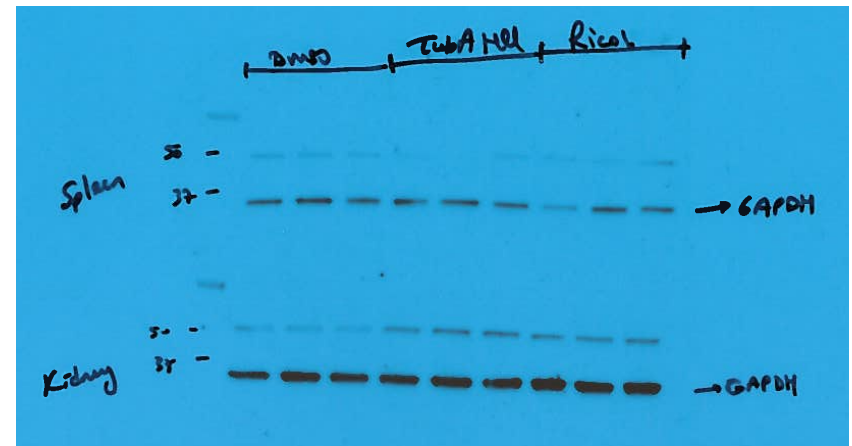

Extended Data Fig 6b

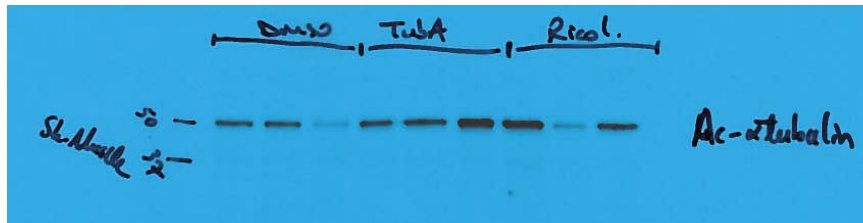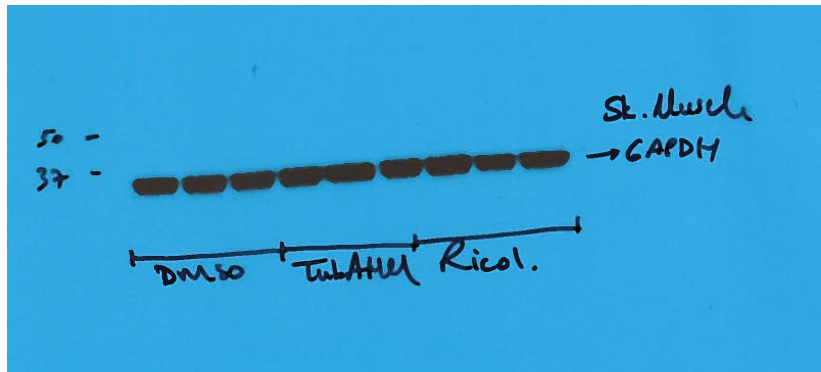

Extended Data Fig 6b

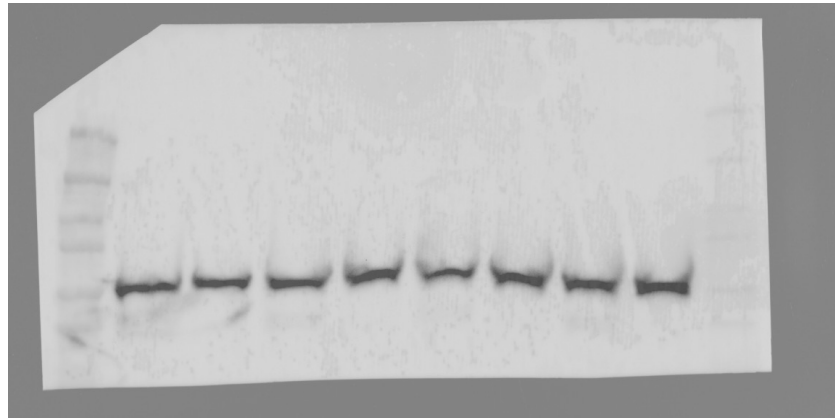

HDAC6 KO, Ac-aTubulin

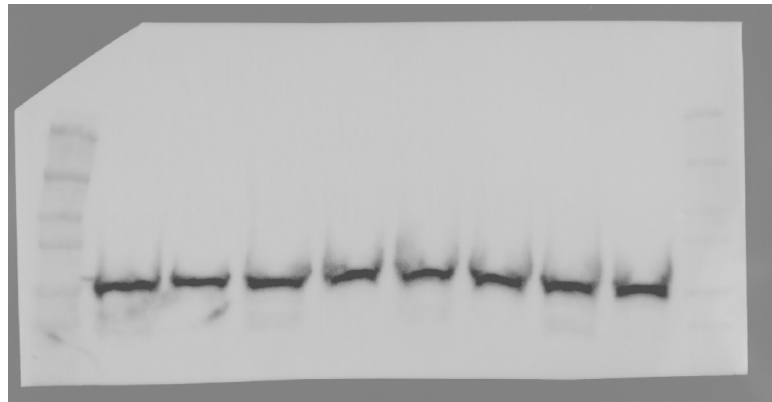

HDAC6 KO, Total-aTubulin

Extended Data Fig 6c
