# Supplementary material
Source: PubMed Central journal article supplement (PMC8892841)
Supplement: NIHMS1762933-supplement-unmodified_blots_EDFig7.pdf [file NIHMS1762933-supplement-unmodified_blots_EDFig7.pdf]

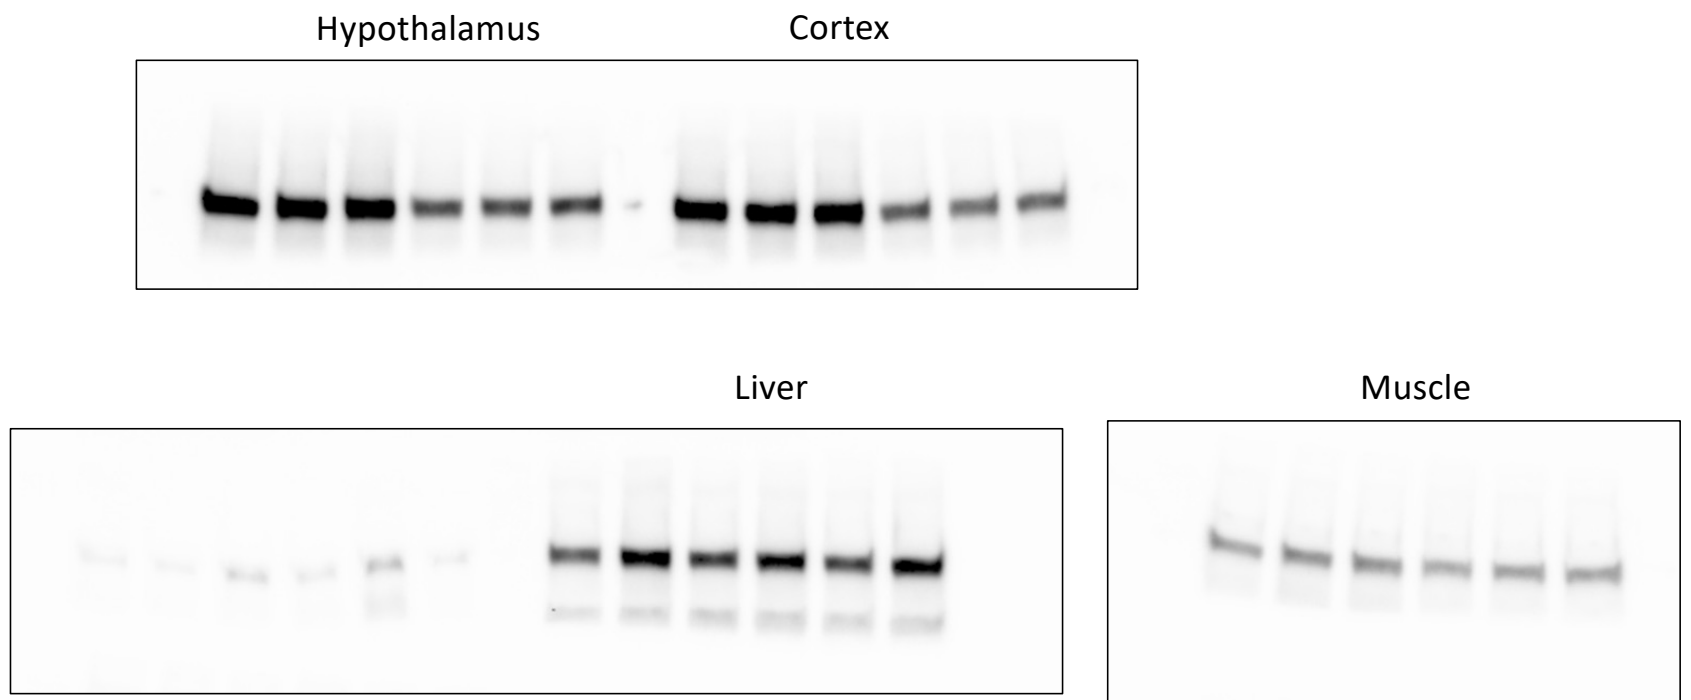

Extended Data Fig 7, HDAC6 blots

Hypothalamus

Cortex

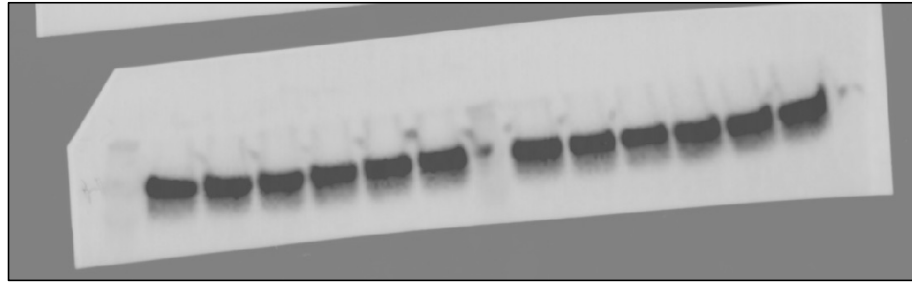

Liver

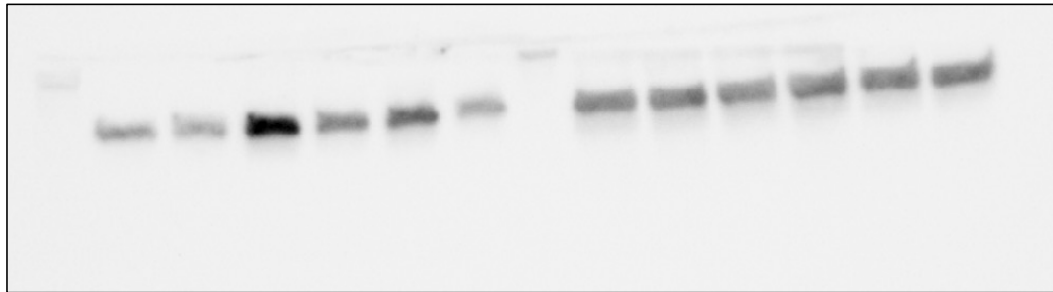

Muscle

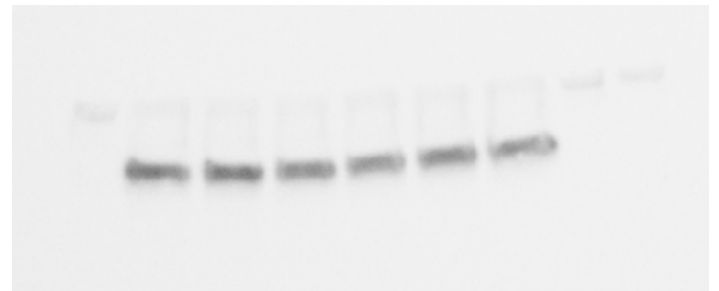

Extended Data Fig 7, aTubulin blots
