# Supplementary material
Source: PubMed Central journal article supplement (PMC8892841)
Supplement: NIHMS1762933-supplement-unmodified_blots_Fig2.pdf [file NIHMS1762933-supplement-unmodified_blots_Fig2.pdf]

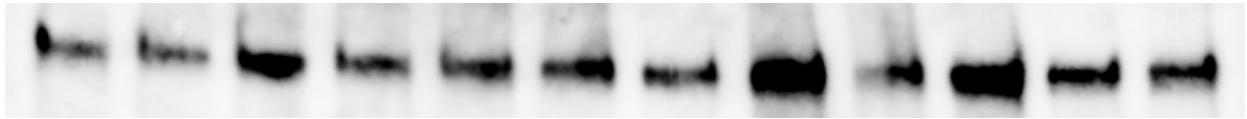

HDAC6

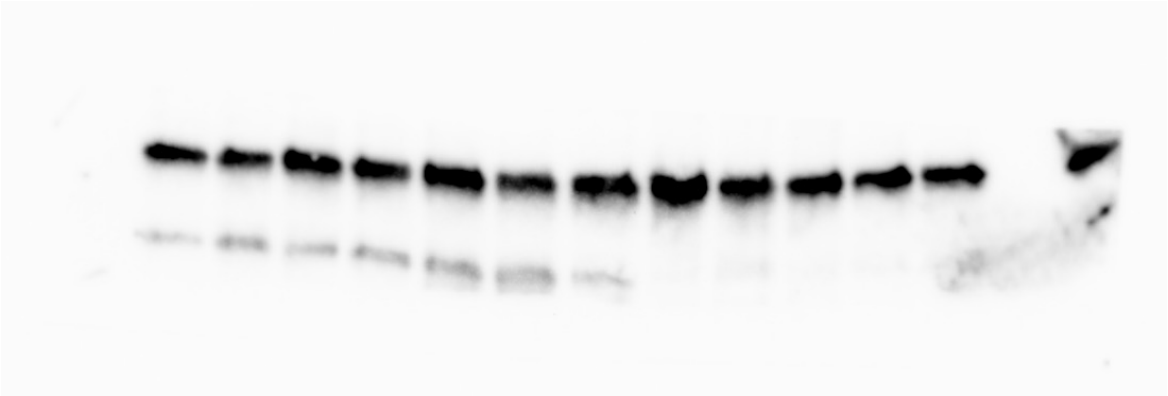

GAPDH

Fig. 2b, WAT

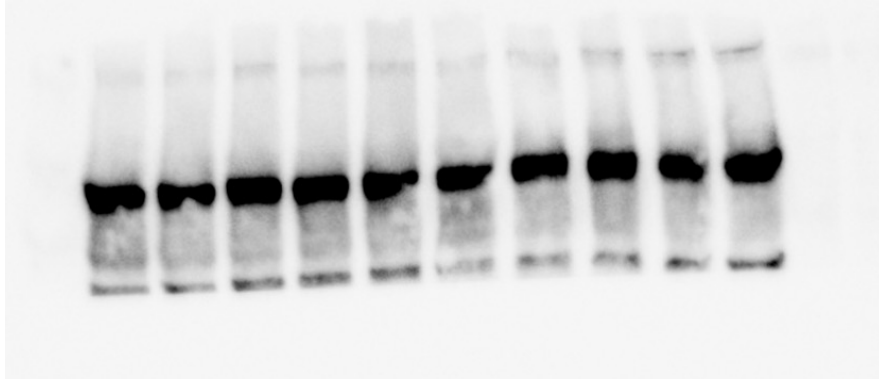

**Fig. 2b, Liver**

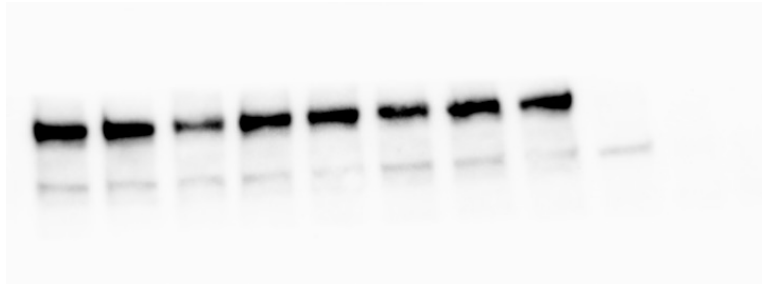

HDAC6

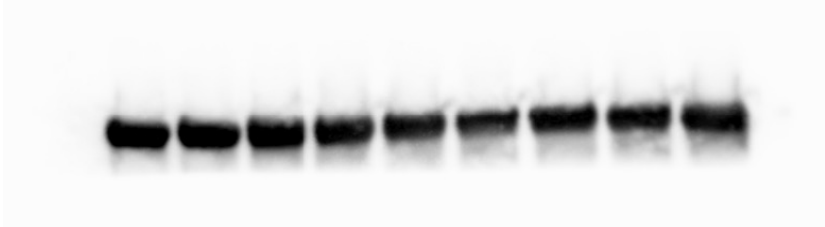

Ac- $\alpha$ Tubulin

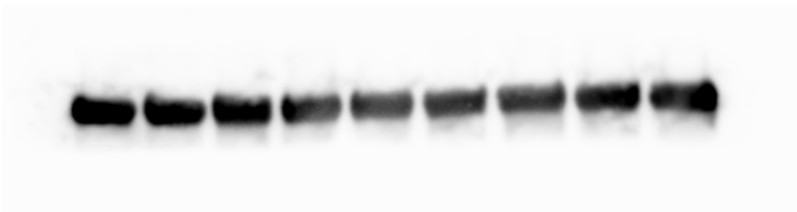

$\alpha$ Tubulin

**Fig. 2b, hypothalamus blots**

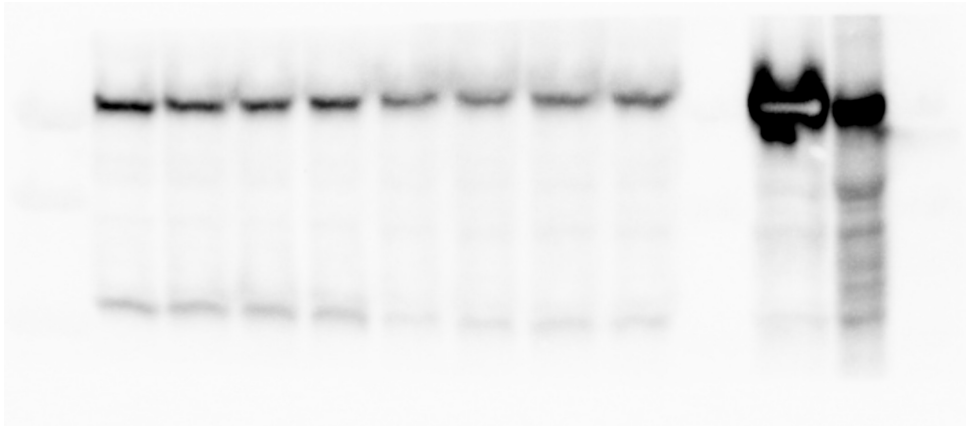

Ac- $\alpha$ Tubulin

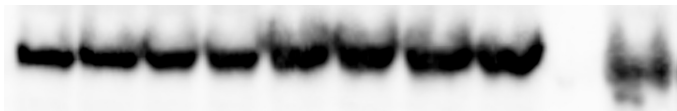

$\alpha$ Tubulin

Fig. 2c

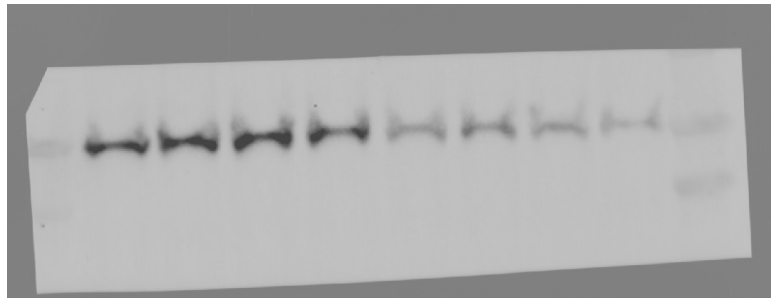

Ac- $\alpha$ Tubulin

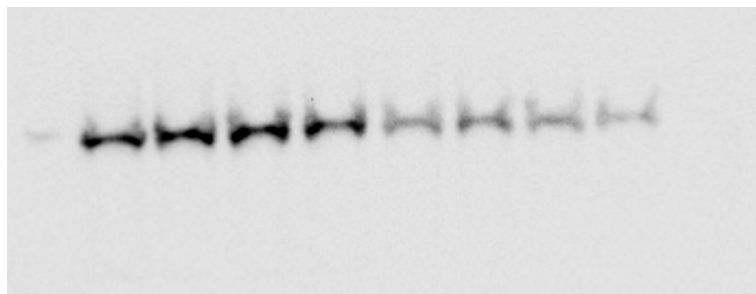

Ac- $\alpha$ Tubulin

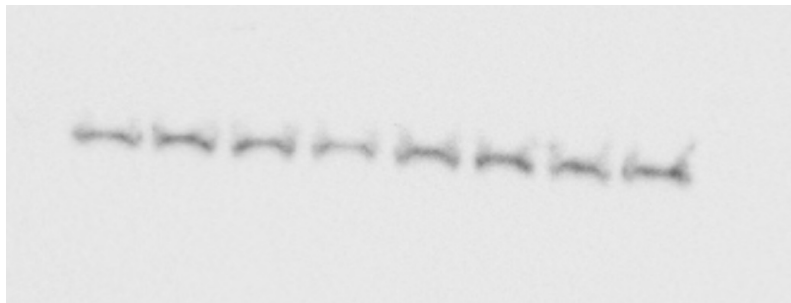

$\alpha$ Tubulin

**Fig. 2c**

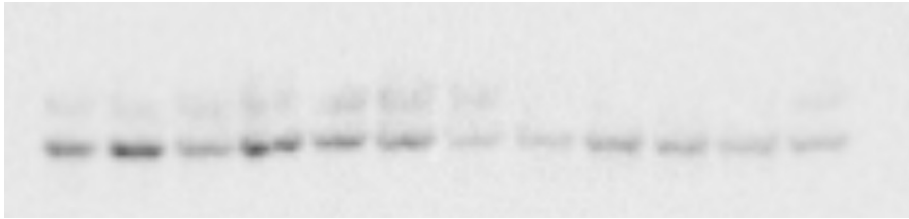

Ac- $\alpha$ Tubulin

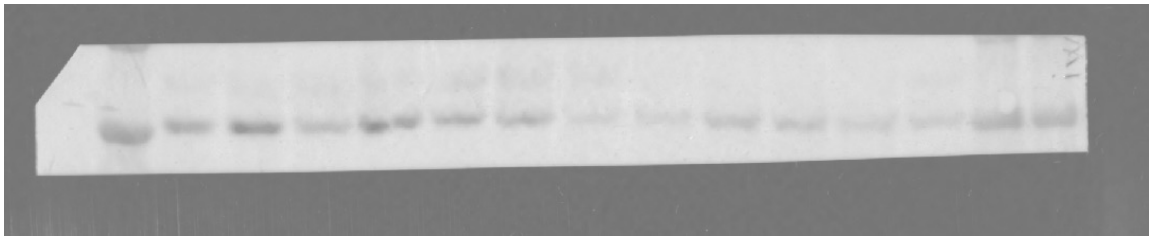

Ac- $\alpha$ Tubulin

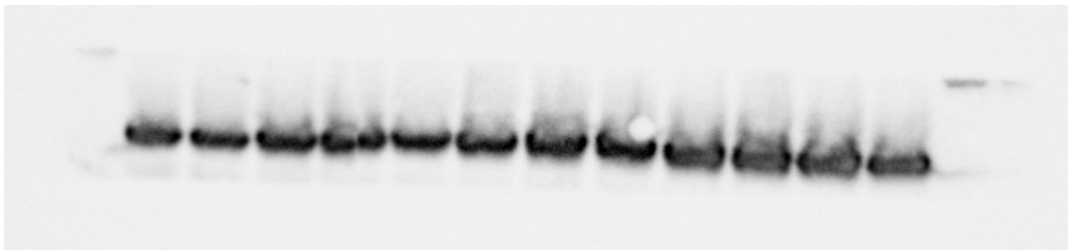

$\alpha$ Tubulin

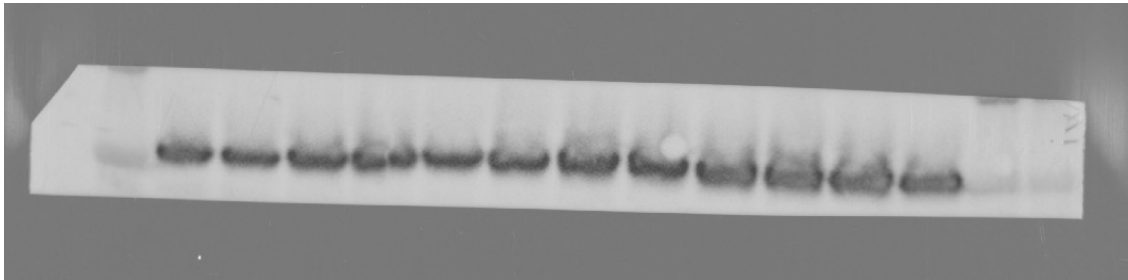

$\alpha$ Tubulin

Fig. 2c

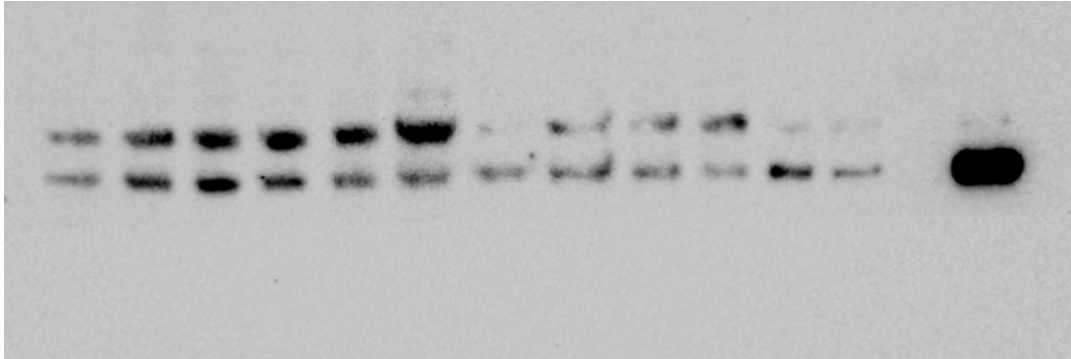

Ac- $\alpha$ Tubulin

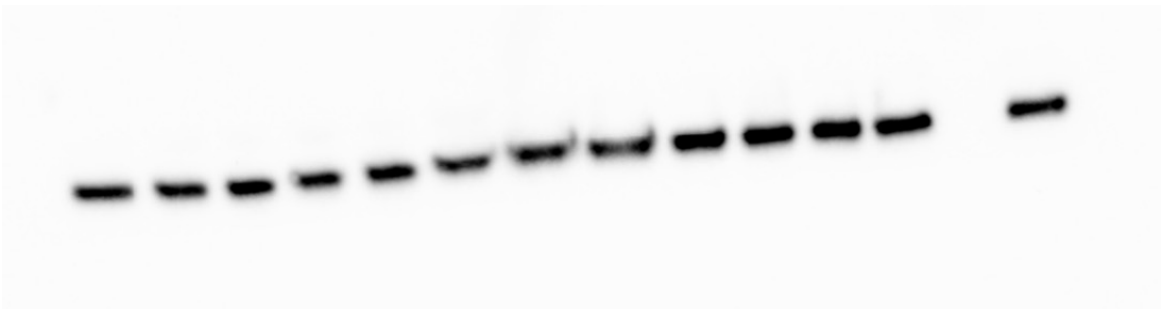

$\alpha$ Tubulin

Fig. 2c

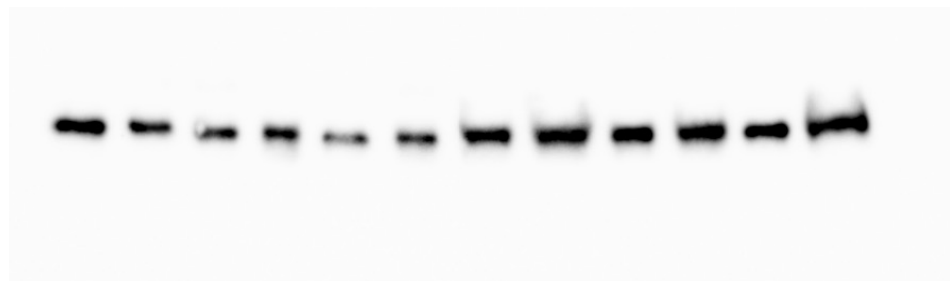

Ac- $\alpha$ Tubulin

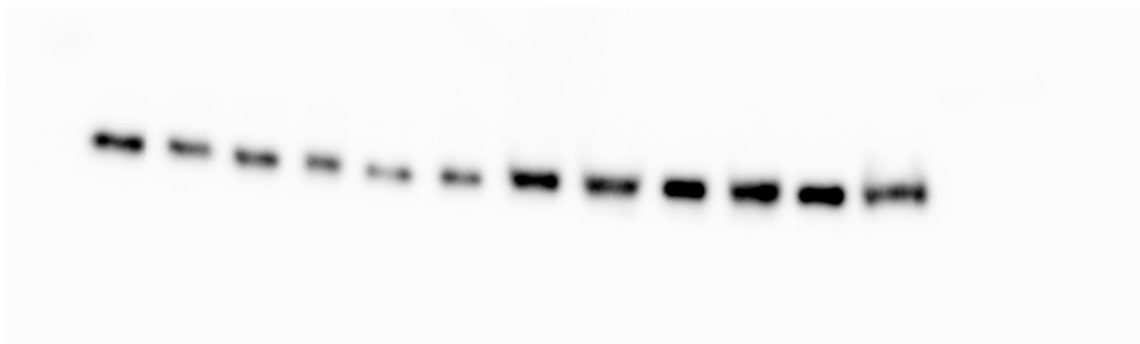

$\alpha$ Tubulin

Fig. 2d



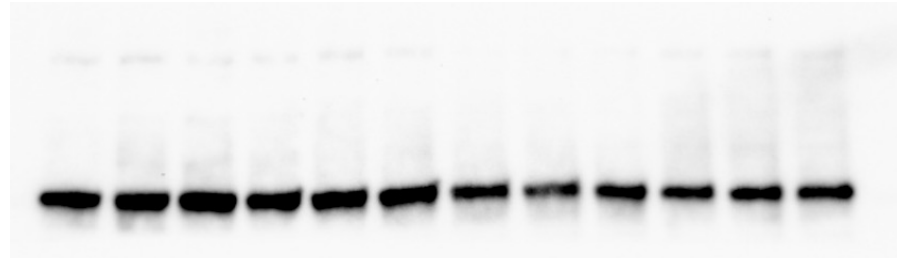

Ac- $\alpha$ Tubulin

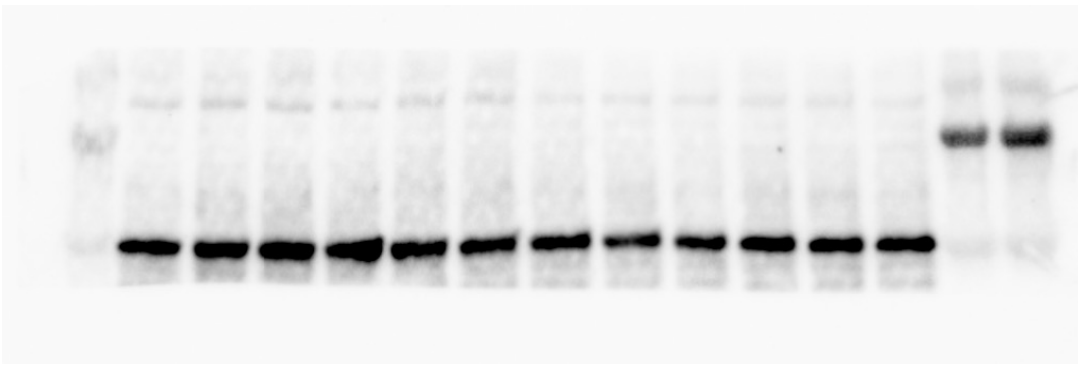

Tubulin

Fig. 2e
