# Supplementary material
Source: PubMed Central journal article supplement (PMC8892841)

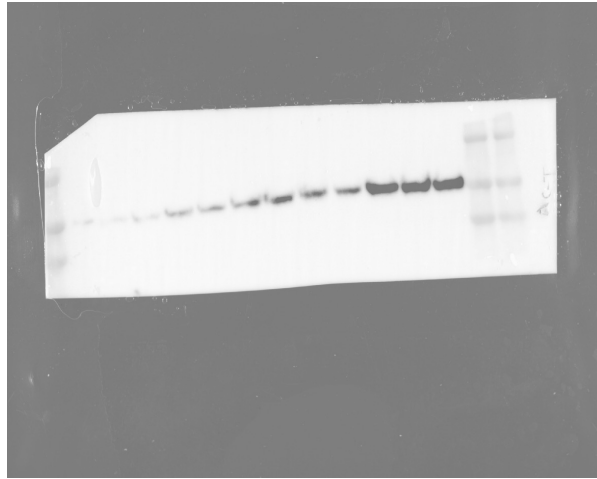

Ac- $\alpha$ Tubulin

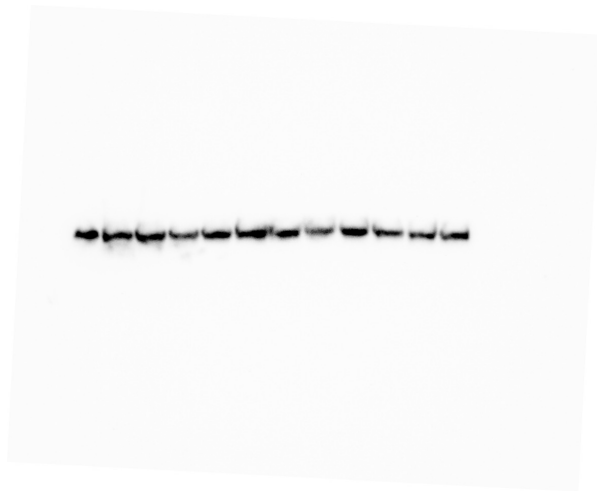

$\alpha$ Tubulin

Extended Data Fig. 1c

Supplement: NIHMS1762933-supplement-unmodified_blots_EDFig1.pdf [file NIHMS1762933-supplement-unmodified_blots_EDFig1.pdf]

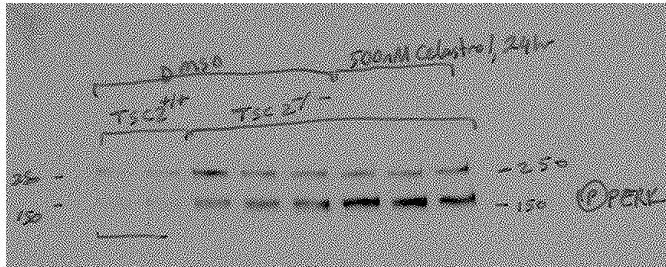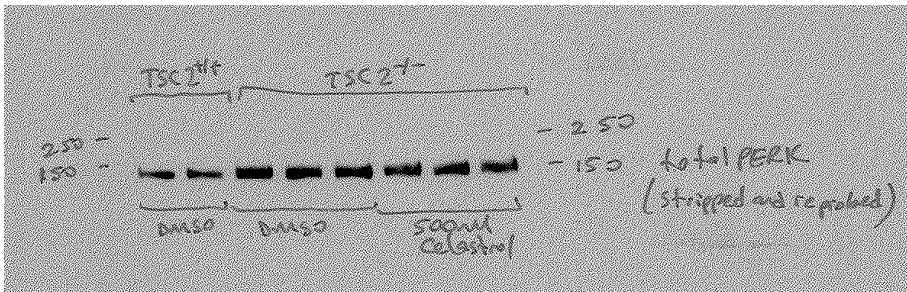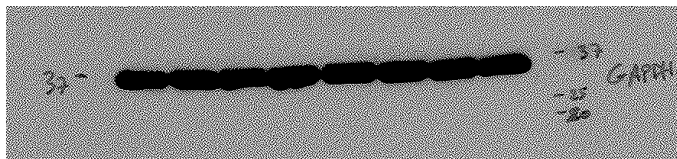

Extended Data Fig. 10

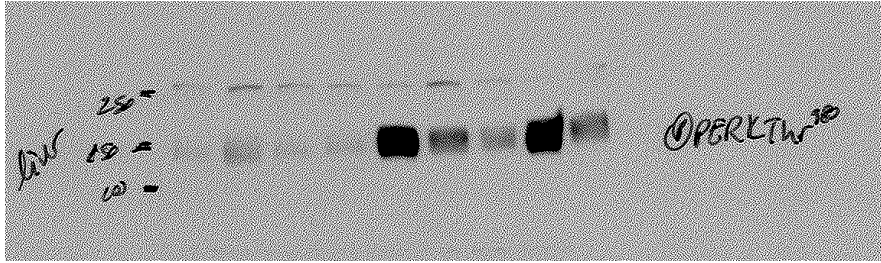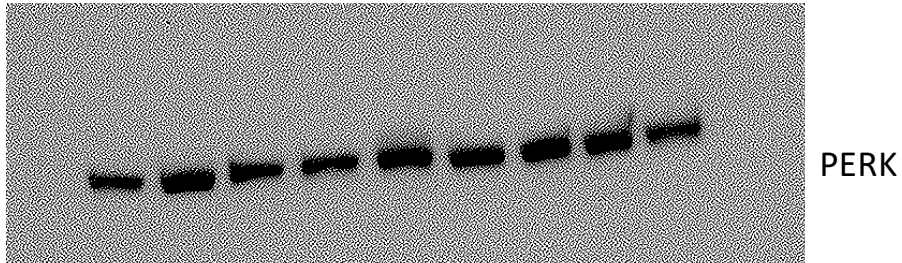

Extended Data Fig. 10

Supplement: NIHMS1762933-supplement-unmodified_blots_EDFig10.pdf [file NIHMS1762933-supplement-unmodified_blots_EDFig10.pdf]

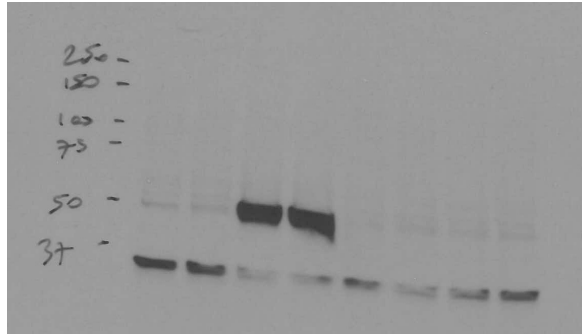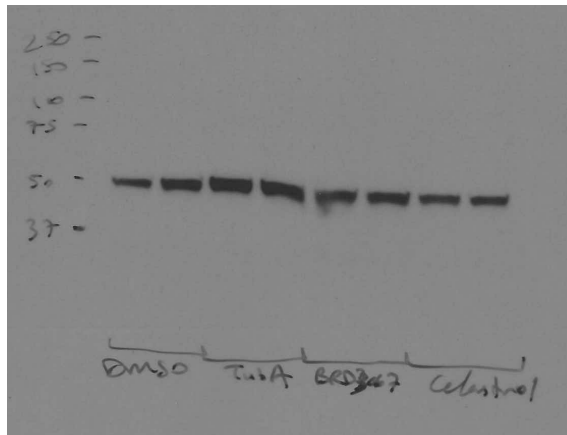

Extended Data Fig. 2c

Supplement: NIHMS1762933-supplement-unmodified_blots_EDFig2.pdf [file NIHMS1762933-supplement-unmodified_blots_EDFig2.pdf]

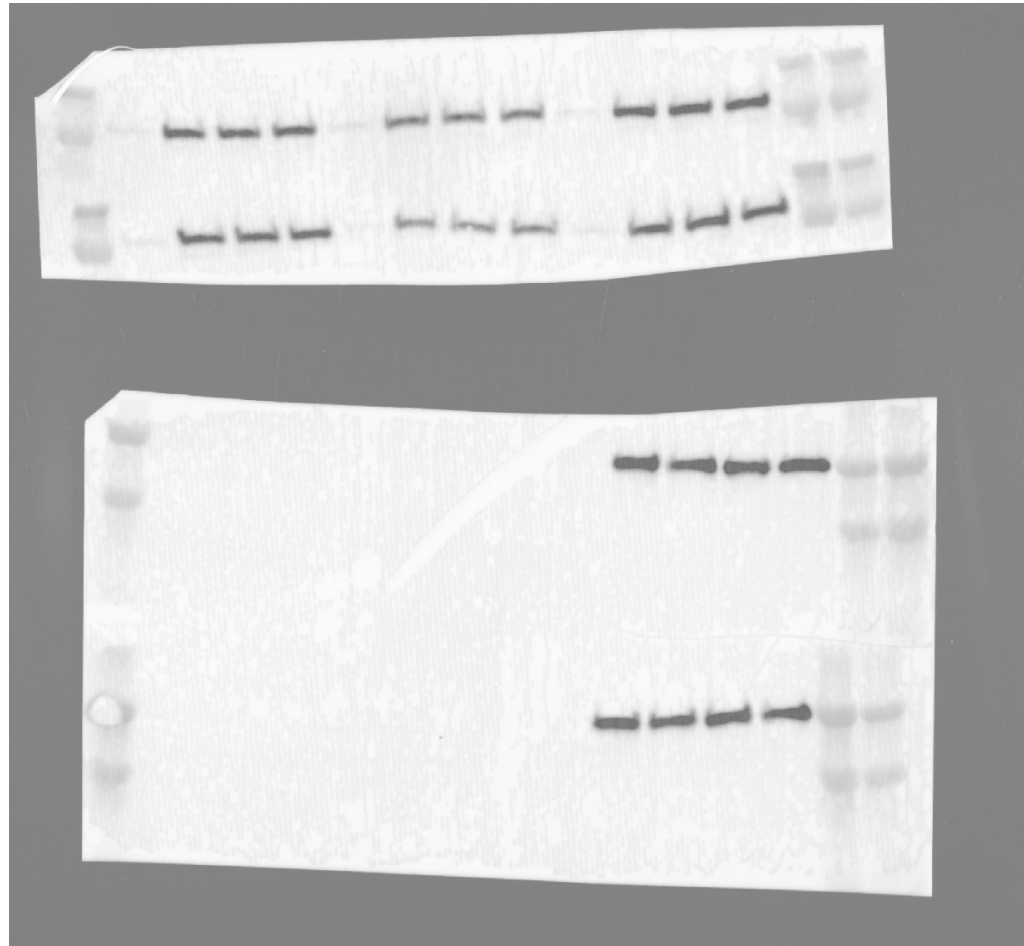

pSTAT3

Ac- $\alpha$ Tubulin

Extended Data Fig. 9

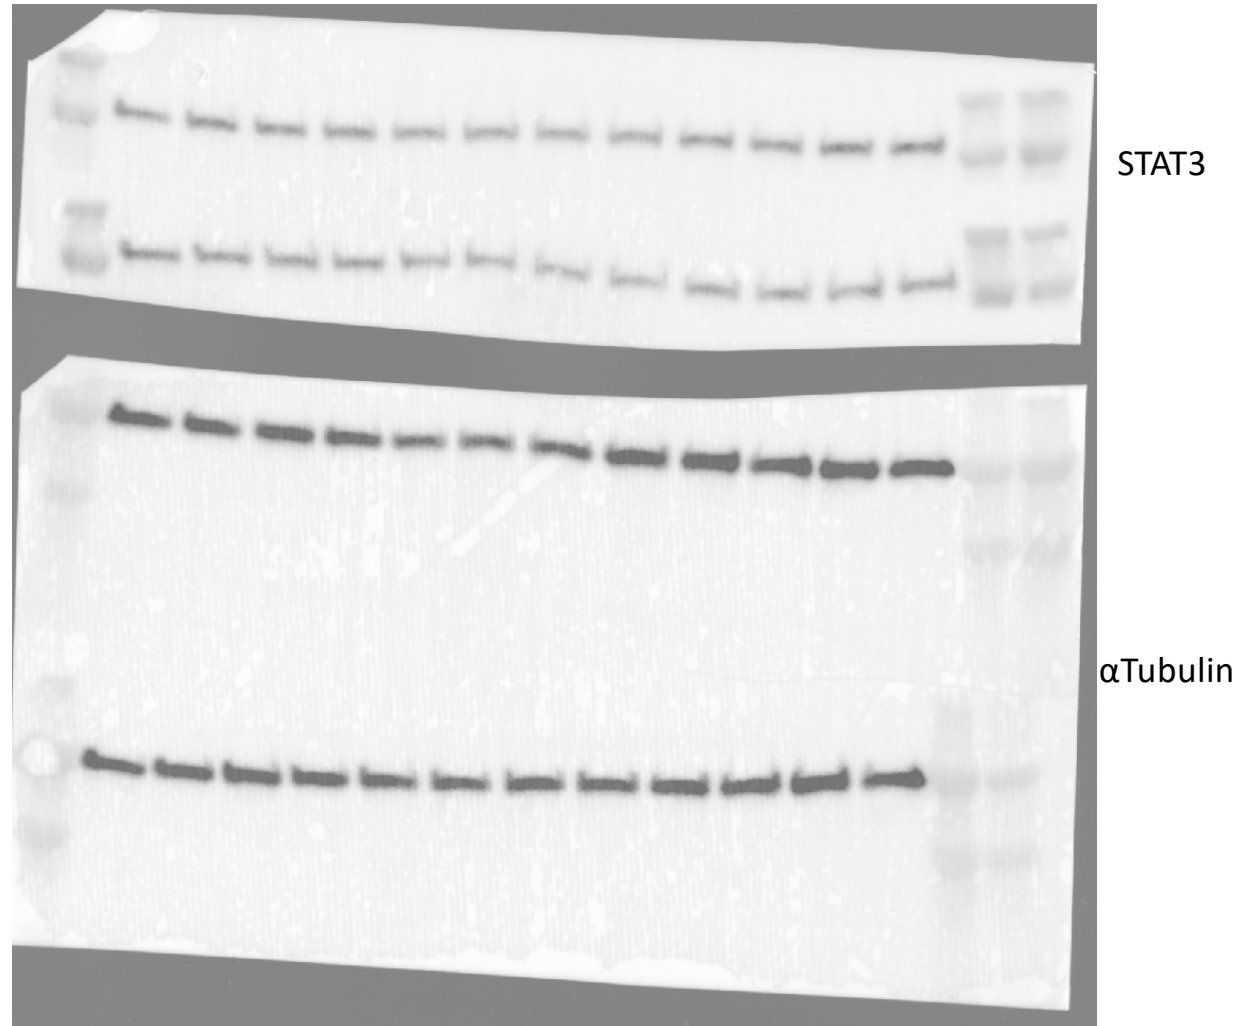

Extended Data Fig. 9

Supplement: NIHMS1762933-supplement-unmodified_blots_EDFig9.pdf [file NIHMS1762933-supplement-unmodified_blots_EDFig9.pdf]

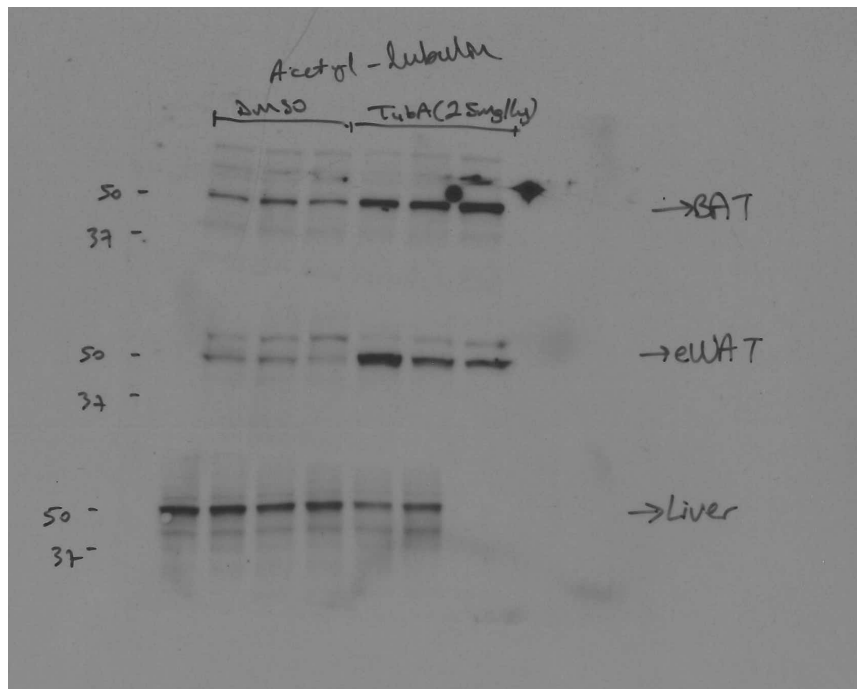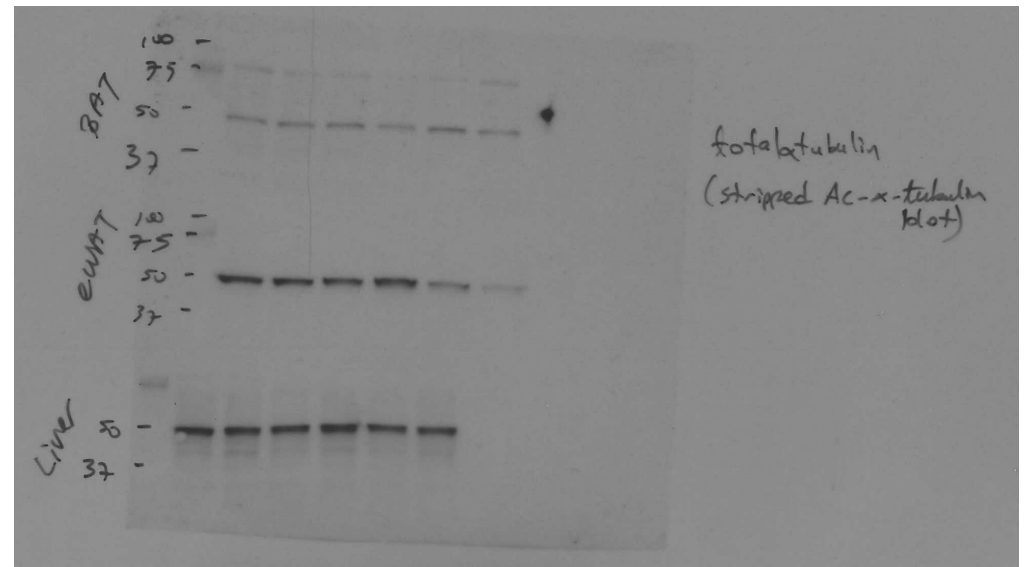

Fig. 6d and Extended Data Fig 6b

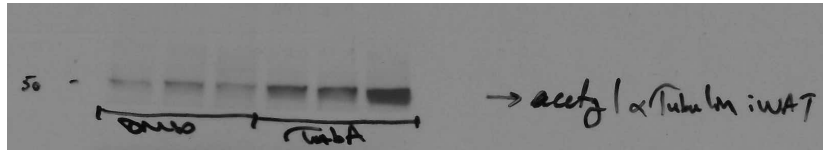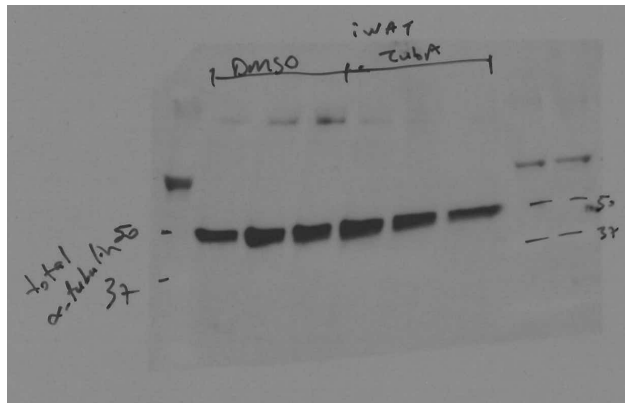

Fig. 6d

Supplement: NIHMS1762933-supplement-unmodified_blots_Fig6.pdf [file NIHMS1762933-supplement-unmodified_blots_Fig6.pdf]
